# Supplementary material
Source: ML conference proceedings conference paper supplement (https://proceedings.neurips.cc/paper_files/paper/2015/hash/b24d516bb65a5a58079f0f3526c87c57-Abstract.html)
Supplement: Supplementary file [file b24d516bb65a5a58079f0f3526c87c57-Supplemental.zip]

## Mathematical Arguments

### Critical time definition: proofs of Theorem 1 and Proposition 1

*Proof of Theorem 1.* Let  $S = \{T \in \mathbb{R}_+ | \sigma_n(T) = o(n)\}$ .  $S$  is an interval containing 0 since  $\sigma_n(0) = 0$  and, if  $T \in S$ , then  $\forall T' \leq T$ ,  $\sigma_n(T') \leq \sigma_n(T)$  and  $T' \in S$ . Thus  $S$  is of the form  $[0, T^c[$  or  $[0, T^c]$ , and let  $T^c = \sup S$  (where  $T^c \in \mathbb{R} \cup \{+\infty\}$ ).

For all time sequences  $(T_n)_{n \in \mathbb{N}}$  such that  $\limsup_{n \rightarrow +\infty} T_n < T^c$ ,  $\exists T < T^c$  and  $n' \geq 0$  s.t.,  $\forall n \geq n', T_n \leq T$ . Hence, by definition of  $T^c$ ,  $\sigma_n(T_n) \leq \sigma_n(T) = o(n)$ .

Conversely, if  $\sigma_n(T_n) = o(n)$ , then  $\liminf_{n \rightarrow +\infty} T_n \in S$ , and  $\liminf_{n \rightarrow +\infty} T_n \leq T^c$ .

Now let  $T^{c'}$  verify the two constraints of Theorem 1. The first constraint implies that  $\forall T < T^{c'}$ ,  $T \in S$  and  $T \leq T^c$ , which leads to  $T^{c'} \leq T^c$ . Moreover,  $\forall T < T^c$ ,  $T \in S$  by definition of  $T^c$ , and  $T \leq T^{c'}$  using the second constraint. As a result,  $T^{c'} = T^c$  and the critical time is unique.  $\square$

*Proof of Proposition 1.* Let  $(T_n)_{n \in \mathbb{N}}$  be such that  $\liminf_{n \rightarrow +\infty} T_n > T^c$ . Then  $\exists T > T^c$  and  $n' \geq 0$  s.t.  $\forall n \geq n', T_n \geq T$ . However,  $T \notin S$  and  $\liminf_{n \rightarrow +\infty} \sigma_n(T)/n > 0$ , which directly implies that  $\liminf_{n \rightarrow +\infty} \sigma_n(T_n)/n \geq \liminf_{n \rightarrow +\infty} \sigma_n(T)/n > 0$ .

Conversely, if  $(T_n)_{n \in \mathbb{N}}$  is such that  $\liminf_{n \rightarrow +\infty} \sigma_n(T_n)/n > 0$ , then  $\limsup_{n \rightarrow +\infty} T_n \notin S$  and  $\limsup_{n \rightarrow +\infty} T_n \geq T^c$ .  $\square$

### Upper bound on the influence: proofs of Proposition 2 and Corollary 1

Let  $\tau_i \in \mathbb{R}_+ \cup \{+\infty\}$  be the infection time of node  $i$ , and  $\tau_{ij} \in \mathbb{R}_+ \cup \{+\infty\}$  the transmission time from node  $i$  to node  $j$ . Let  $A \subset \mathcal{V}$  be a set of influencers, i.e. nodes that are infected at time 0:  $\forall i \in A, \tau_i = 0$ . Due to the infection dynamic of CTIC, a node  $i \notin A$  is infected when at least one of its neighbors is infected, and the respective ingoing edge transmitted the contagion. We thus have the following equation relating infection times  $\tau_i$  and  $\tau_{ji}$  (see for example [1]):  $\forall i \notin A$ ,

$$\tau_i = \min_{j \in \mathcal{V}} \tau_j + \tau_{ji}. \quad (1)$$

Let  $X_i(t) = \mathbb{1}_{\{\tau_i < t\}}$  be the infection state of node  $i$  at time  $t$ . Eq. 1 implies the following equation:  $\forall t > 0$  and  $i \notin A$ ,

$$X_i(t) = 1 - \prod_{j \in \mathcal{V}} (1 - \mathbb{1}_{\{\tau_j + \tau_{ji} < t\}}). \quad (2)$$

We now develop the proofs for Proposition 2 and Corollary 1, which rely on upper bounding the Laplace transform of  $\sigma_A(T)$ .

**Lemma 1.** Define  $\rho(s) = \rho(\frac{\mathcal{H}(s) + \mathcal{H}(s)^\top}{2})$ . Then, for any  $A$  such that  $|A| = n_0 < n$ , denoting by  $\hat{\sigma}_A(s) = \int_0^{+\infty} \sigma_A(t) e^{-st} dt$  the Laplace transform of the expected number of nodes reached by the cascade starting from  $A$  at time  $T$ :

$$s \hat{\sigma}_A(s) \leq n_0 + \gamma(s)(n - n_0), \quad (3)$$

where  $\gamma(s)$  is the smallest solution in  $[0, 1]$  of the following equation:

$$\gamma(s) - 1 + \exp\left(-\rho(s)\gamma(s) - \frac{\rho(s)n_0}{\gamma(s)(n - n_0)}\right) = 0. \quad (4)$$

This result requires two intermediate lemmas: Lemma 2, that proves for  $i \in \mathcal{V}$  and  $t > 0$  a positive correlation between the events 'node  $j$  did not infect node  $i$  before time  $t$ ' and Lemma 4, that bounds the probability that a given node gets infected before  $t$ .

**Lemma 2.**  $\forall i \notin A$  and  $t > 0$ ,  $\{1 - \mathbb{1}_{\{\tau_j + \tau_{ji} < t\}}\}_{j \in \mathcal{V}}$  are positively correlated.

*Proof.* Denoting by  $\mathcal{Q}_i$  the collection of directed paths in  $G$  from the influencers  $A$  to node  $i$ , we get the following expression for variables  $(\tau_i)_{i \in \mathcal{V}}$  [1]:

$$\tau_i = \min_{q \in \mathcal{Q}_i} \sum_{(j,l) \in q} \tau_{jl} \quad (5)$$

Therefore, for all  $i \notin A$  and  $t > 0$ , the functions  $f_{ij}(\tau_{kl})_{(k,l) \in \mathcal{E}} = \{1 - \mathbb{1}_{\{\tau_j + \tau_{ji} < t\}}\}_{j \in \mathcal{V}}$  are increasing with the partial order on  $(\tau_{kl})_{(k,l) \in \mathcal{E}}$ . We will then make use of the FKG inequality [2]:

**Lemma 3.** (FKG inequality) *Let  $L$  be a finite distributive lattice, and  $\mu$  a nonnegative function on  $L$ , such that, for any  $(x, y) \in L^2$ ,*

$$\mu(x \vee y) \mu(x \wedge y) \leq \mu(x) \mu(y) \quad (6)$$

*Then, for any non-decreasing function  $f$  and  $g$  on  $L$*

$$\left( \sum_{x \in L} f(x) g(x) \right) \left( \sum_{x \in L} \mu(x) \right) \geq \left( \sum_{x \in L} f(x) \mu(x) \right) \left( \sum_{x \in L} g(x) \mu(x) \right) \quad (7)$$

Due to the independence of  $(\tau_{kl})_{(k,l) \in \mathcal{E}}$ , the condition in Lemma 3 is met by their joint distribution, which is a product measure on the product space  $\mathbb{R}^{\mathcal{E}}$ . Lemma 2 is then obtained by applying Lemma 3 to any couple of functions  $(f_{ij}, f_{ik})_{(i,j) \in \mathcal{E}, (i,k) \in \mathcal{E}}$ . More specifically, in our problem setting,  $L$  is the set of all  $(\tau_{kl})_{(k,l) \in \mathcal{E}}$ ,  $\mu(x) = \prod_{(k,l) \in \mathcal{E}} \mathbb{P}(\tau_{kl} = t_{kl})$  is the joint probability distribution of the  $\tau_{kl}$  when  $x = (t_{kl})_{(k,l) \in \mathcal{E}}$ . □

We then show the following lemma that reveals an implicit inequation satisfied by the  $X_i$ .

**Lemma 4.** *For all  $(i, j) \in \mathcal{V}^2$ , let  $p_{ij}$  be an integrable function such that  $\int_0^{+\infty} p_{ij}(t) dt < 1$ . For any  $A$  such that  $|A| = n_0 < n$  and for any  $i \notin A$ , the probability  $\mathbb{E}[X_i(t)]$  that node  $i$  will be reached by the contagion originating from  $A$  verifies:*

$$\mathbb{E}[X_i(t)] \leq 1 - \exp \left( - \sum_j (\mathcal{H}_{ji} * \mathbb{E}[X_j])(t) \right), \quad (8)$$

where  $(f * g)(t) = \int f(s)g(t-s)ds$  stands for the convolution of  $f$  with  $g$  and  $\mathcal{H}_{ji}(t) = \frac{\ln(1 - \int_0^{+\infty} p_{ji}(s)ds)}{\int_0^{+\infty} p_{ji}(s)ds} p_{ji}(t)$ .

*Proof.* Eq. 2 and the positive correlation of  $\{1 - \mathbb{1}_{\{\tau_j + \tau_{ji} < t\}}\}_{j \in \{1, \dots, N\}}$  (Lemma 2) imply that

$$\mathbb{E}[X_i(t)] = 1 - \mathbb{E} \left[ \prod_j (1 - \mathbb{1}_{\{\tau_j + \tau_{ji} < t\}}) \right] \leq 1 - \prod_j \mathbb{E}[1 - \mathbb{1}_{\{\tau_j + \tau_{ji} < t\}}] \quad (9)$$

which leads to

$$\begin{aligned} \mathbb{E}[X_i(t)] &\leq 1 - \prod_j (1 - \mathbb{E}[\mathbb{1}_{\{\tau_j + \tau_{ji} < t\}}]) \\ &= 1 - \prod_j (1 - \mathbb{E}[\mathbb{E}[X_j(t - \tau_{ji}) | \tau_{ji}]]), \\ &= 1 - \prod_j \left( 1 - \int_0^{+\infty} \mathbb{E}[X_j(s)] p_{ji}(t-s) ds \right), \end{aligned} \quad (10)$$

since  $\forall i, j \in \mathcal{V}$ ,  $\tau_j$  and  $\tau_{ji}$  are independent and  $p_{ji}$  is the probability density of  $\tau_{ji}$ . Note that, in our setting, we consider that influencer nodes are infected at time 0, and thus are not infectious before  $t = 0$ . We then linearize the product in Eq. 10:

$$\begin{aligned} \mathbb{E}[X_i(t)] &\leq 1 - \exp \left( \sum_j \ln(1 - \int_0^{+\infty} \mathbb{E}[X_j(s)] p_{ji}(t-s) ds) \right) \\ &\leq 1 - \exp \left( \sum_j \frac{\ln(1 - \int_0^{+\infty} p_{ji}(s) ds)}{\int_0^{+\infty} p_{ji}(s) ds} \int_0^{+\infty} \mathbb{E}[X_j(s)] p_{ji}(t-s) ds \right) \\ &= 1 - \exp \left( - \sum_j (\mathcal{H}_{ji} * \mathbb{E}[X_j])(t) \right), \end{aligned} \quad (11)$$

since we have on the one hand, for any  $x \in [0, 1]$  and  $a < 1$ ,  $\ln(1 - ax) \geq \ln(1 - a)x$  (in Eq. 11, we chose  $a = \int_0^{+\infty} p_{ji}(s)ds$  and  $x = \frac{\int_0^{+\infty} \mathbb{E}[X_j(s)]p_{ji}(t-s)ds}{\int_0^{+\infty} p_{ji}(s)ds}$ ), and on the other hand  $\mathcal{H}_{ji}(t) = \frac{\ln(1 - \int_0^{+\infty} p_{ji}(s)ds)}{\int_0^{+\infty} p_{ji}(s)ds} p_{ji}(t)$  by definition of  $\mathcal{H}$ . Note that  $\frac{\ln(1 - \int_0^{+\infty} p_{ji}(s)ds)}{\int_0^{+\infty} p_{ji}(s)ds}$  is approximately 1 when  $\int_0^{+\infty} p_{ji}(s)ds$  is close to 0.  $\square$

*Proof of Lemma 1.* From here, Proposition 1 follow from Lemma 4 in the exact same way than, in [3], the proof of Proposition 1 is deduced from Lemma 8. However, we give here the fully detailed proof for sake of completeness.

Let  $f_i(s) = \int_0^{+\infty} \mathbb{E}[X_i(t)]s e^{-st} dt$ , then, using Jensen's inequality,  $\forall i \notin A$  and  $s \geq 0$ ,

$$f_i(s) \leq 1 - \exp\left(-\sum_j \mathcal{L}\mathcal{H}_{ji}(s)f_j(s)\right), \quad (12)$$

where  $\mathcal{L}\mathcal{H}_{ji}(s) = \int_0^{+\infty} \mathcal{H}_{ji}(t)e^{-st}dt$  is the Laplace transform of  $\mathcal{H}_{ji}$ . Note also that  $\forall i \in A$ ,  $f_i(s) = 1$ .

For every  $i \in [1..n]$ , we define  $Z_i = (f_i(s))_i$  and the vector  $Z = (Z_i)_{i \in [1..n]}$ . Using lemma 4 and convexity of exponential function, we have for any  $u \in R^n$  such that  $\forall i \in A$ ,  $u_i = 0$  and  $\forall i \notin A$ ,  $u_i \geq 0$ ,

$$u^\top Z \leq |u|_1 \left(1 - \sum_{i=1}^{n-1} \frac{u_i}{|u|_1} \exp(-(\mathcal{L}\mathcal{H}^\top Z)_i)\right) \leq |u|_1 \left(1 - \exp\left(-\frac{Z^\top \mathcal{L}\mathcal{H}u}{|u|_1}\right)\right) \quad (13)$$

where  $|u|_1 = \sum_i |u_i|$  is the  $L_1$ -norm of  $u$ .

Now taking  $u = (1_{i \notin A} Z_i)_i$  and noting that  $\forall i$ ,  $u_i \leq Z_i$ , we have

$$\frac{Z^\top Z - n_0}{|Z|_1 - n_0} \leq 1 - \exp\left(-\frac{Z^\top \mathcal{L}\mathcal{H}Z}{|Z|_1 - n_0}\right) \leq 1 - \exp\left(-\frac{\rho(s)(Z^\top Z - n_0)}{|Z|_1 - n_0} - \frac{\rho(s)n_0}{|Z|_1 - n_0}\right) \quad (14)$$

where  $\rho(s) = \rho(\frac{\mathcal{L}\mathcal{H} + \mathcal{L}\mathcal{H}^\top}{2})$ . Defining  $y = \frac{Z^\top Z - n_0}{|Z|_1 - n_0}$  and  $z = |Z|_1 - n_0 = s\hat{\sigma}_A(s) - n_0$ , the inequation above rewrites

$$y \leq 1 - \exp\left(-\rho(s)y - \frac{\rho(s)n_0}{z}\right) \quad (15)$$

But by Cauchy-Schwarz inequality applied to  $u$ ,  $(n - n_0)(Z^\top Z - n_0) \geq (|Z|_1 - n_0)^2$ , which means that  $z \leq y(n - n_0)$ . We now consider the equation

$$x - 1 + \exp\left(-\rho(s)x - \frac{\rho(s)n_0}{x(n - n_0)}\right) = 0 \quad (16)$$

Because the function  $f : x \rightarrow x - 1 + \exp\left(-\rho(s)x + \frac{\rho(s)n_0}{x(n - n_0)}\right)$  is continuous, verifies  $f(1) > 0$  and  $\lim_{x \rightarrow 0^+} f(x) = -1$ , equation 16 admits a solution  $\gamma(s)$  in  $]0, 1[$ .

We then prove by contradiction that  $z \leq \gamma(s)(n - n_0)$ . Let us assume  $z > \gamma(s)(n - n_0)$ . Then  $y \leq 1 - \exp\left(-\rho(s)y - \frac{\rho(s)n_0}{\gamma(s)(n - n_0)}\right)$ . But the function  $h : x \rightarrow x - 1 + \exp\left(-\rho(s)x + \frac{\rho(s)n_0}{\gamma(s)(n - n_0)}\right)$  is convex and verifies  $h(0) < 0$  and  $h(\gamma(s)) = 0$ . Therefore, for any  $y > \gamma_1$ ,  $0 = f(\gamma_1) \leq \frac{\gamma(s)}{y} f(y) + (1 - \frac{\gamma(s)}{y}) f(0)$ , and therefore  $f(y) > 0$ . Thus,  $y \leq \gamma(s)$ . But  $z \leq y(n - n_0) \leq \gamma(s)(n - n_0)$  which yields the contradiction.  $\square$

Using Lemma 1, we may now prove Proposition 2:

*Proof of Proposition 2.*  $\forall s \geq 0$ ,  $T \geq 0$  and  $t \geq 0$ ,  $e^{-st} \geq e^{-sT} \mathbb{1}_{\{t < T\}}$ , hence, using Lemma 1,  $s\hat{\sigma}_A(s) = \sum_i \mathbb{E}[e^{-s\tau_i}] \geq n_0 + (\sigma_A(T) - n_0)e^{-sT}$  which leads to the desired inequality.  $\square$

*Proof of Corollary 1.* Using Eq. 16 and the fact that  $1 - e^{-x} \leq x$ , we get  $\gamma(s) \leq \rho(s)\gamma(s) + \frac{\rho(s)n_0}{\gamma(s)(n-n_0)}$  which rewrites  $\gamma(s) \leq \sqrt{\frac{\rho(s)n_0}{(1-\rho(s))(n-n_0)}}$  in the case  $\rho(s) < 1$ . Therefore,

$$\sigma_A(T) \leq n_0 + \sqrt{n_0(n-n_0)} \min_{\{s \geq 0 | \rho(s) < 1\}} \left( \sqrt{\frac{\rho(s)}{1-\rho(s)}} e^{sT} \right). \quad (17)$$

□

### Upper bounds on the critical time: proofs of Corollary 2 and Corollary 3

*Proof of Corollary 2.* Since  $e^{-st}$  is decreasing w.r.t.  $s$ ,  $\mathcal{LH}_{ij}(s)$  is decreasing. Thus, the Perron-Frobenius theorem implies that  $\rho(s)$  is decreasing. When  $\rho(0) \geq 1$ ,  $\rho^{-1}(1-\epsilon)$  exists and is uniquely defined, and using Corollary 1 and 2,  $\sigma_A(T) \leq n_0 + (n-n_0)\gamma(\rho^{-1}(1-\epsilon))e^{\rho^{-1}(1-\epsilon)T} \leq n_0 + \sqrt{\frac{n_0(n-n_0)}{\epsilon}} e^{\rho^{-1}(1-\epsilon)T}$ . □

*Proof of Corollary 3.* If  $\limsup_{n \rightarrow +\infty} \frac{2\rho^{-1}(1)T_n}{\ln n} < 1$ , then  $\exists \alpha > 0$  and  $n' \geq 0$  s.t.  $\forall n \geq n'$ ,  $\rho^{-1}(1)T_n \leq \frac{(1-\alpha)\ln n}{2}$ . Furthermore,  $\lim_{n \rightarrow +\infty} \frac{\rho^{-1}(1-\frac{1}{\ln n})}{\rho^{-1}(1)} = 1$ , thus  $\exists n'' \geq n'$  s.t.  $\forall n \geq n''$ ,  $\rho^{-1}(1 - \frac{1}{\ln n}) \leq \frac{1-\alpha/2}{1-\alpha} \rho^{-1}(1)$ . Using Corollary 2 with  $\epsilon = \frac{1}{\ln n}$ ,  $\sigma_A(T) \leq 1 + \sqrt{\ln n(n-1)} e^{\rho^{-1}(1-\frac{1}{\ln n})T} \leq 1 + \sqrt{\ln n} n^{1-\alpha/4} = o(n)$ . □

### Application to particular contagion model: proofs of Corollary 4, Proposition 3, Proposition 5 and Corollary 5

*Proof of Corollary 4.* Taking  $\rho(s) = \frac{\lambda}{\lambda+s} \rho_\alpha$ , Corollary 1 rewrites

$$\sigma_A(T) \leq n_0 + \sqrt{n_0(n-n_0)} \min_{s \geq 0} \left( \sqrt{\frac{\lambda}{s + \lambda(1-\rho_\alpha)}} e^{sT} \right). \quad (18)$$

The function  $f(s) = \sqrt{\frac{\lambda}{s + \lambda(1-\rho_\alpha)}} e^{sT}$  admits a unique minimum in  $s_{min} = \frac{1}{2T} + \lambda(\rho_\alpha - 1)$ . The minimum for  $s \geq 0$  is therefore met for  $s = s_{min}$  if  $\lambda T(1 - \rho_\alpha) < \frac{1}{2}$  and  $s = 0$  otherwise. The results follow immediately. □

*Proof of Proposition 3.* In order to prove Proposition 3, it is sufficient to show that Lemma 4 still holds for the SIR model, with  $p_{ij}(t) = \beta \exp(-(\delta + \beta)t)$  for  $(i, j) \in \mathcal{E}$ . For  $i \in \mathcal{V}$ , let  $\theta_i$  be the random removal time of node  $i$ . Infection times  $\tau_i$  are then given by the following expression, where  $\mathcal{Q}_i$  is the collection of directed paths in  $G$  from the influencers  $A$  to node  $i$ :

$$\tau_i = \min_{q \in \mathcal{Q}_i} \sum_{(j,l) \in q} \tau_{jl} \mathbb{1}_{\{\tau_{jl} < \theta_j\}} \quad (19)$$

Therefore  $\forall i \notin A$  and  $t > 0$ , the functions  $f_{ij}(\tau, \theta) = \{1 - \mathbb{1}_{\{\tau_j + \tau_{ji} < t\}} \mathbb{1}_{\{\tau_{ji} < \theta_j\}}\}_{j \in \mathcal{V}}$  are increasing with respect to the partial order on  $\mathbb{R}^\mathcal{E} \times \mathbb{R}^\mathcal{V}$  defined for any  $X^1 = (\tau_1^1, \dots, \tau_m^1, \theta_1^1, \dots, \theta_n^1) \in \mathbb{R}^\mathcal{E} \times \mathbb{R}^\mathcal{V}$  and  $X^2 = (\tau_1^2, \dots, \tau_m^2, \theta_1^2, \dots, \theta_n^2) \in \mathbb{R}^\mathcal{E} \times \mathbb{R}^\mathcal{V}$  by:

$$X^1 \geq X^2 \iff \begin{cases} \tau_{ij}^1 \geq \tau_{ij}^2 & \text{for any } (i, j) \in \mathcal{E} \\ \theta_i^1 \leq \theta_i^2 & \text{for any } i \in \mathcal{V} \end{cases}. \quad (20)$$

Variables  $(\tau_{ij})_{(i,j) \in \mathcal{E}}$  and  $(\theta_i)_{i \in \mathcal{V}}$  being independent, we can still apply FKG inequality (Lemma 3) and deduce the positive correlation, for any  $i \notin A$  and  $t > 0$ , of the random variables  $\{1 - \mathbb{1}_{\{\tau_j + \tau_{ji} < t\}} \mathbb{1}_{\{\tau_{ji} < \theta_j\}}\}_{j \in \mathcal{V}}$ . We then introduce, for any  $(i, j) \in \mathcal{E}$ :

$$\overline{\tau_{ji}} = \begin{cases} \tau_{ji} & \text{if } \tau_{ji} < \theta_j \\ +\infty & \text{if } \tau_{ji} \geq \theta_j \end{cases}. \quad (21)$$

It is straightforward that each  $\overline{\tau}_{ji}$  is a random variable over  $\mathbb{R}_+ \cup \{+\infty\}$  with probability distribution  $p_{ij}$ , and that  $\overline{\tau}_{ji}$  is independent of  $\tau_j$ . We also have, for any  $i \notin A$ ,  $t > 0$  and  $(i, j) \in \mathcal{E}$ :

$$\{1 - \mathbb{1}_{\{\tau_j + \tau_{ji} < t\}} \mathbb{1}_{\{\tau_{ji} < \theta_j\}}\} = \{1 - \mathbb{1}_{\{\tau_j + \overline{\tau}_{ji} < t\}}\} \quad (22)$$

Lemma 4 for the SIR case (and therefore Proposition 3 and its subsequent corollaries) are then proved from following the same steps than in the independent transmission events case, except replacing  $(\tau_{ji})_{(i,j) \in \mathcal{E}}$  by  $(\overline{\tau}_{ji})_{(i,j) \in \mathcal{E}}$   $\square$

*Proof of Proposition 5.*  $\rho(s) = \frac{\beta T_n}{1 - e^{-\beta T_n}} \frac{\beta}{\beta + s} (1 - e^{-(\beta + s)T_n}) \rho(\mathcal{A}) \leq \frac{\beta^2 T_n \rho(\mathcal{A})}{(1 - e^{-\beta T_n})s}$ , which implies  $\rho^{-1}(1)T_n \leq \frac{(\beta T_n)^2 \rho(\mathcal{A})}{1 - e^{-\beta T_n}}$ . Let  $f(x) = \frac{x^2}{1 - e^{-x}}$ ,  $f$  is increasing and  $\forall a \geq 0$ ,  $f(x) = a \implies x \geq \sqrt{a}(1 - e^{-\sqrt{a}})$ . Hence, if  $\limsup_{n \rightarrow +\infty} \frac{\beta T_n}{\sqrt{\frac{\ln n}{2\rho(\mathcal{A}_n)}}(1 - e^{-\sqrt{\frac{\ln n}{2\rho(\mathcal{A}_n)}}})} < 1$ , then  $\exists \alpha > 0$  s.t.  $\beta T_n \leq (1 - \alpha)\sqrt{\frac{\ln n}{2\rho(\mathcal{A}_n)}}(1 - e^{-\sqrt{\frac{\ln n}{2\rho(\mathcal{A}_n)}}})$ , and the concavity of  $1 - e^{-x}$  implies that  $\beta T_n \leq \sqrt{\frac{(1 - \alpha)\ln n}{2\rho(\mathcal{A}_n)}}(1 - e^{-\sqrt{\frac{(1 - \alpha)\ln n}{2\rho(\mathcal{A}_n)}}})$ . Finally,  $f(\beta T_n) \leq \frac{(1 - \alpha)\ln n}{2\rho(\mathcal{A}_n)}$  and  $\frac{2\rho^{-1}(1)T_n}{\ln n} \leq 1 - \alpha$ . Applying Corollary 3 proves the desired result.  $\square$

*Proof of Corollary 5.* Taking  $\rho(s) = \rho_\alpha e^{-sT_0}$ , Corollary 1 rewrites

$$\sigma_A(T) \leq n_0 + \sqrt{n_0(n - n_0)} \min_{s \geq 0} \left( \sqrt{\frac{\rho_\alpha e^{-sT_0}}{1 - \rho_\alpha e^{-sT_0}}} e^{sT} \right). \quad (23)$$

and  $s = \frac{1}{T_0} (\ln \rho_\alpha - \ln(1 - \frac{T_0}{2T}))$  gives

$$\sigma_A(T) \leq n_0 + \sqrt{n_0(n - n_0)} \sqrt{\frac{2T}{T_0} - 1} \left( \frac{\rho_\alpha}{1 - \frac{T_0}{2T}} \right)^{\frac{T}{T_0}}. \quad (24)$$

The final result follows by upper bounding  $(1 - \frac{T_0}{2T})^{\frac{1}{2} - \frac{T}{T_0}}$  by  $\sqrt{e}$  due to the monotonic increase of  $x \rightarrow (x - 1) \ln(1 - \frac{1}{x})$  on  $[1, +\infty[$  and its limit when  $x \rightarrow +\infty$ .  $\square$

## Additional references

- [1] Nan Du, Le Song, Manuel Gomez-Rodriguez, and Hongyuan Zha. Scalable influence estimation in continuous-time diffusion networks. In *Advances in Neural Information Processing Systems*, pages 3147–3155, 2013.
- [2] Cees M Fortuin, Pieter W Kasteleyn, and Jean Ginibre. Correlation inequalities on some partially ordered sets. *Communications in Mathematical Physics*, 22(2):89–103, 1971.
- [3] Remi Lemonnier, Kevin Scaman, and Nicolas Vayatis. Tight bounds for influence in diffusion networks and application to bond percolation and epidemiology. In *Advances in Neural Information Processing Systems*, pages 846–854, 2014.
